# Supplementary material for: Combination of Bone Marrow Biopsy and Flow Cytometric Analysis: The Prognostically Relevant Central Approach for Detecting Bone Marrow Invasion in Diffuse Large B-Cell Lymphoma
Source: MDPI journal article supplement (doi:10.3390/diagnostics11091724), 2021-09-20
Supplement: s1 [file s1]

**Supplementary Table S1. Impact of the detection of BM involvement by single or combinatory modality on overall survival**

| Modality                           | Result (n) | Univariate analysis |            |        | Multivariate analysis* |           |       |         |
|------------------------------------|------------|---------------------|------------|--------|------------------------|-----------|-------|---------|
|                                    |            | HR                  | 95% CI     | p      | HR                     | 95% CI    | p     | c-index |
| BM biopsy                          | – (170)    | 1                   | –          | –      | 1                      | –         | –     |         |
|                                    | + (14)     | 5.22                | 2.61–10.47 | <0.001 | 3.00                   | 1.31–6.84 | 0.009 | 0.738   |
| BM clot                            | – (172)    | 1                   | –          | –      | 1                      | –         | –     |         |
|                                    | + (12)     | 3.44                | 1.67–7.07  | <0.001 | 2.03                   | 0.92–4.47 | 0.079 | 0.735   |
| FCM                                | – (166)    | 1                   | –          | –      | 1                      | –         | –     |         |
|                                    | + (18)     | 2.24                | 1.13–4.45  | 0.021  | 1.86                   | 0.92–3.74 | 0.082 | 0.74    |
| BM smear                           | – (158)    | 1                   | –          | –      | 1                      | –         | –     |         |
|                                    | + (26)     | 2.16                | 1.18–3.97  | 0.0013 | 1.27                   | 0.65–2.46 | 0.483 | 0.729   |
| BM biopsy and/or clot              | – (186)    | 1                   | –          | –      | 1                      | –         | –     |         |
|                                    | + (16)     | 3.78                | 1.94–7.35  | <0.001 | 2.48                   | 1.18–5.21 | 0.017 | 0.745   |
| BM biopsy and/or FCM               | – (156)    | 1                   | –          | –      | 1                      | –         | –     |         |
|                                    | + (28)     | 3.26                | 1.84–5.77  | <0.001 | 2.37                   | 1.28–4.40 | 0.006 | 0.748   |
| BM biopsy and/or smear             | – (152)    | 1                   | –          | –      | 1                      | –         | –     |         |
|                                    | + (32)     | 2.43                | 1.38–4.31  | 0.002  | 1.51                   | 0.81–2.81 | 0.197 | 0.734   |
| BM clot and/or FCM                 | – (158)    | 1                   | –          | –      | 1                      | –         | –     |         |
|                                    | + (26)     | 2.72                | 1.53–4.85  | <0.001 | 1.95                   | 1.06–3.59 | 0.033 | 0.742   |
| BM clot and/or smear               | – (154)    | 1                   | –          | –      | 1                      | –         | –     |         |
|                                    | + (30)     | 2.48                | 1.40–4.39  | 0.002  | 1.56                   | 0.83–2.91 | 0.164 | 0.738   |
| FCM and/or BM smear                | – (146)    | 1                   | –          | –      | 1                      | –         | –     |         |
|                                    | + (38)     | 2.27                | 1.32–3.90  | 0.003  | 1.60                   | 0.89–2.86 | 0.114 | 0.741   |
| BM biopsy, clot, and/or FCM        | – (155)    | 1                   | –          | –      | 1                      | –         | –     |         |
|                                    | + (29)     | 2.77                | 1.57–4.88  | <0.001 | 2.03                   | 1.11–3.72 | 0.021 | 0.746   |
| BM biopsy, clot, and/or smear      | – (151)    | 1                   | –          | –      | 1                      | –         | –     |         |
|                                    | + (33)     | 2.56                | 1.46–4.48  | 0.001  | 1.65                   | 0.89–3.04 | 0.112 | 0.742   |
| BM biopsy, FCM, and/or smear       | – (142)    | 1                   | –          | –      | 1                      | –         | –     |         |
|                                    | + (42)     | 2.45                | 1.44–4.16  | <0.001 | 1.71                   | 0.97–3.04 | 0.066 | 0.742   |
| BM clot, FCM, and/or smear         | – (144)    | 1                   | –          | –      | 1                      | –         | –     |         |
|                                    | + (40)     | 2.55                | 1.50–4.33  | <0.001 | 1.77                   | 1.00–3.14 | 0.05  | 0.744   |
| BM biopsy, clot, FCM, and/or smear | – (142)    | 1                   | –          | –      | 1                      | –         | –     |         |
|                                    | + (42)     | 2.45                | 1.44–4.16  | <0.001 | 1.71                   | 0.97–3.04 | 0.066 | 0.742   |

BM, bone marrow; CI, confidence interval; HR, hazard ratio; –, negative; +, positive; \* adjusting for IPI factors.

**Supplementary Table S2. Cox proportional-hazards regression analysis for PFS**

|          |                | Univariate analysis |           |        | Multivariate analysis * |           |       |         |
|----------|----------------|---------------------|-----------|--------|-------------------------|-----------|-------|---------|
| Modality | Result (n)     | HR                  | 95% CI    | p      | HR                      | 95% CI    | p     | c-index |
| PET-CT   | Negative (124) | 1                   | –         | –      | 1                       | –         | –     |         |
|          | Positive (30)  | 3.03                | 1.76–5.22 | <0.001 | 1.77                    | 0.92–3.43 | 0.089 | 0.680   |

PET-CT, positron emission tomography of 18F-fluorodeoxyglucose and computed tomography; PFS, progression-free survival \*adjusted by IPI factors (age, LDH, PS 2–4, disease stage III and IV, and extranodal lesion).
